# Supplementary material for: Vapor Phase Synthesis of SnS Facilitated by Ligand-Driven “Launch Vehicle” Effect in Tin Precursors
Source: MDPI journal article supplement (doi:10.3390/molecules26175367), 2021-09-03
Supplement: s1 [file s1]

# Supporting Information

## Vapor phase synthesis of SnS facilitated by ligand-driven 'launch vehicle' effect in tin precursors

Ufuk Atamtürk<sup>1</sup>, Veronika Brune<sup>1</sup>, Shashank Mishra<sup>2,\*</sup> and Sanjay Mathur<sup>1,\*</sup>

<sup>1</sup>Institute of Inorganic Chemistry, Greinstrasse 6, 50939 Cologne, Germany

<sup>2</sup>Université Claude Bernard Lyon 1, CNRS, UMR 5256, IRCELYON, 2 avenue Albert Einstein, 69626 Villeurbanne, France

Correspondence:

[shashank.mishra@ircelyon.univ-lyon1.fr](mailto:shashank.mishra@ircelyon.univ-lyon1.fr) (S. Mishra)

[sanjay.mathur@uni-koeln.de](mailto:sanjay.mathur@uni-koeln.de) (S. Mathur)

### NMR Spectroscopy

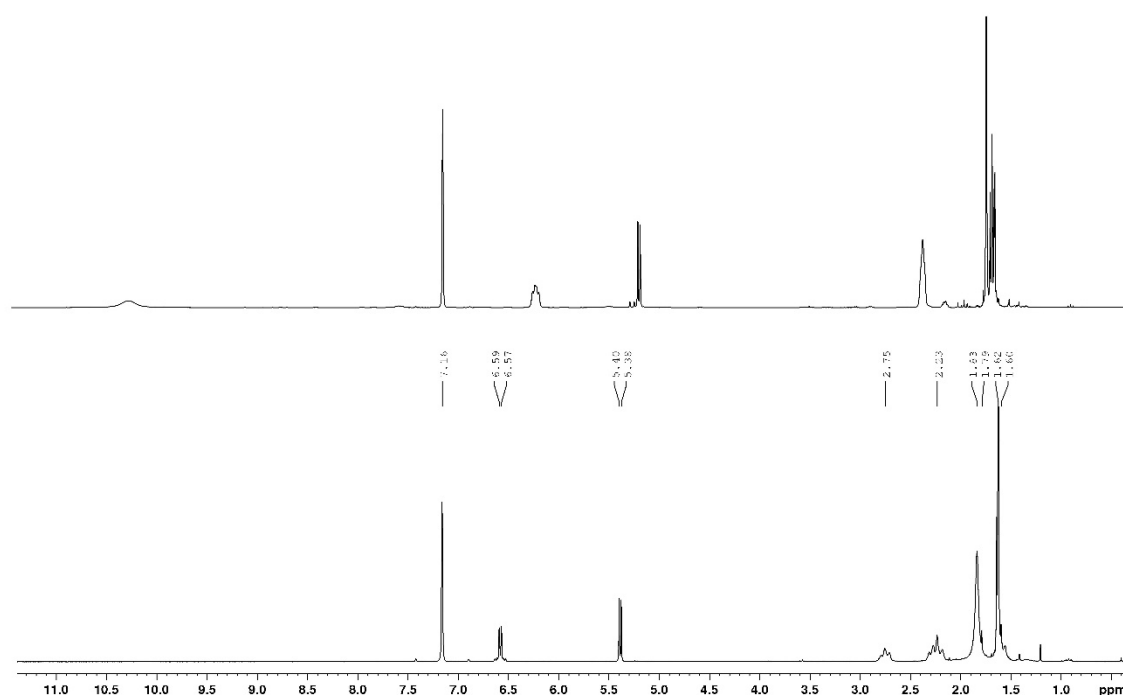

Fig. S1: Comparison of the <sup>1</sup>H NMR spectra of Htfb-dmeda and 1a in C<sub>6</sub>D<sub>6</sub> and recorded at 300 MHz.

### Variable temperature NMR

Variable temperature NMR spectra were recorded on a AVANCE 400 spectrometer equipped with a 5 mm TBI probehead. The cooling rate was adjusted so that lowering the temperature by 10 K was reached in 20 min of time. At each temperature the sample was allowed to equilibrate for 10-15 min, followed by recalibrating the frequencies by the tune and match procedure and shimming of the magnets. The  $^{119}\text{Sn}\{^1\text{H}\}$ -NMR spectra were offset to  $\text{o1p} = -157$ , and the spectral widths were narrowed to  $\text{sw} = 500$ . The minimum number of scans for  $^{119}\text{Sn}\{^1\text{H}\}$  was  $\text{ns} = 128$  and the max.  $\text{ns} = 1 \text{ k}$  (depending on the temperature stability the VT unit of the spectrometers was able to maintain) and in all  $^1\text{H}$ -NMR spectra  $\text{ns} = 32$ .

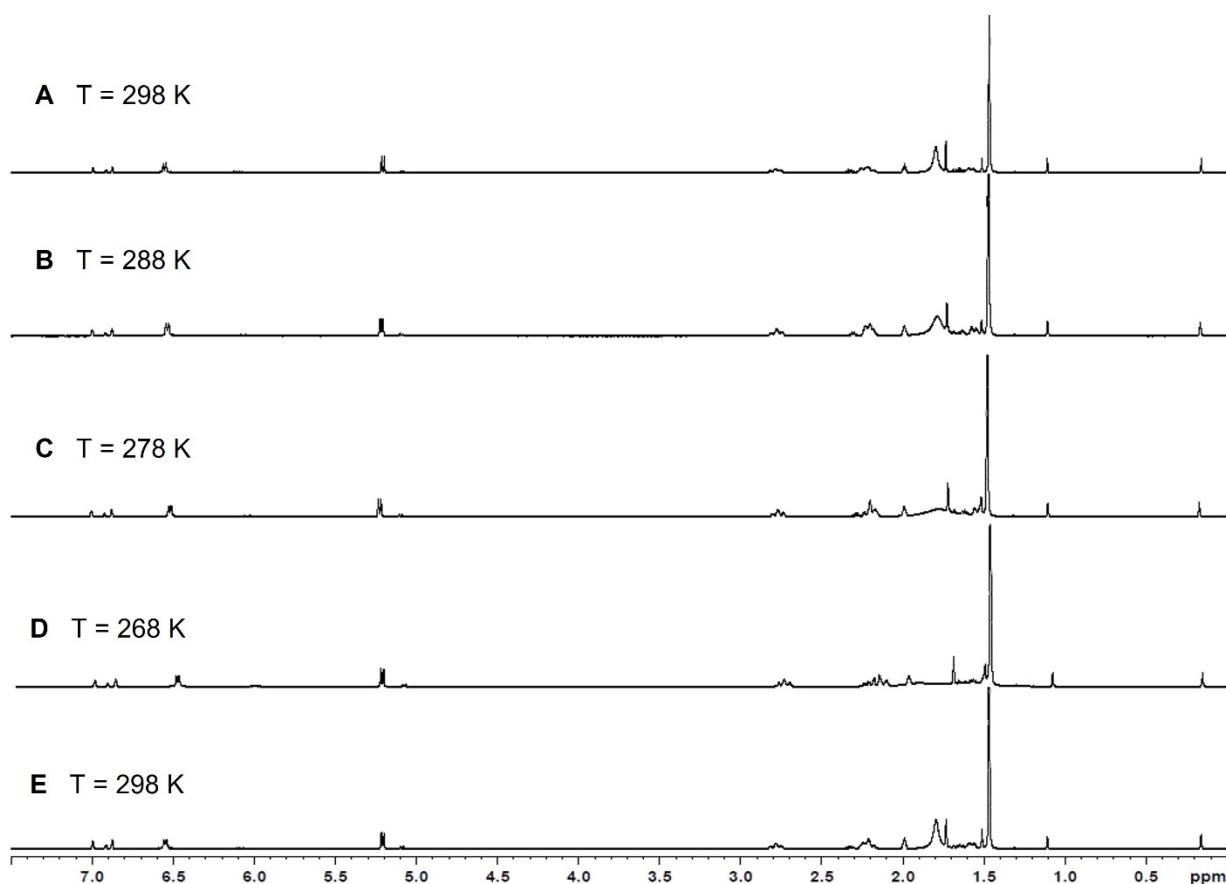

Fig. S2:  $^1\text{H}$ -NMR variable temperature spectra of **1** in toluene- $d_8$ . The bottom spectrum at  $T = 298 \text{ K}$  was recorded after cooling, when the NMR tube was warmed up to room temperature again, showing the full reversibility of the observed equilibria.

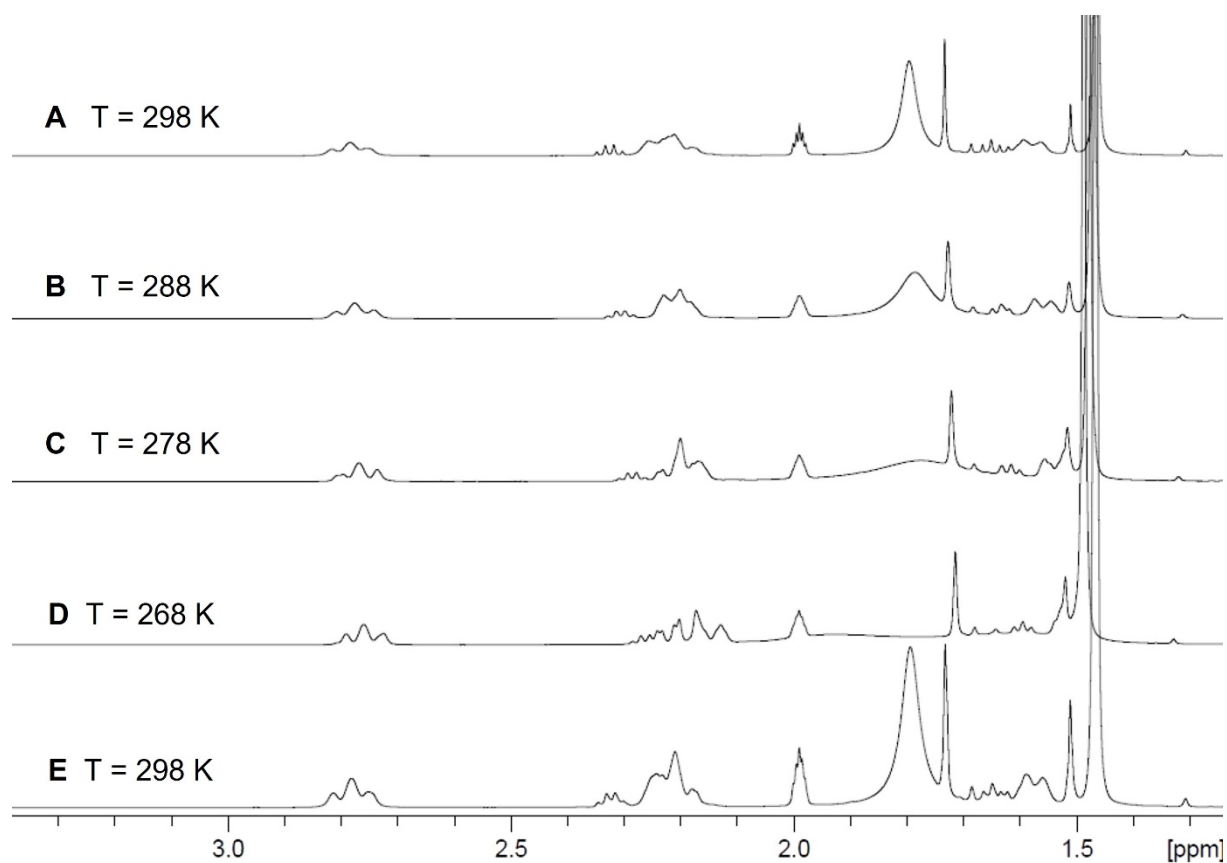

Fig. S3: Enlarged part of the  $^1\text{H}$ -NMR variable temperature spectra of **1** (Fig. S2) for better visualization.

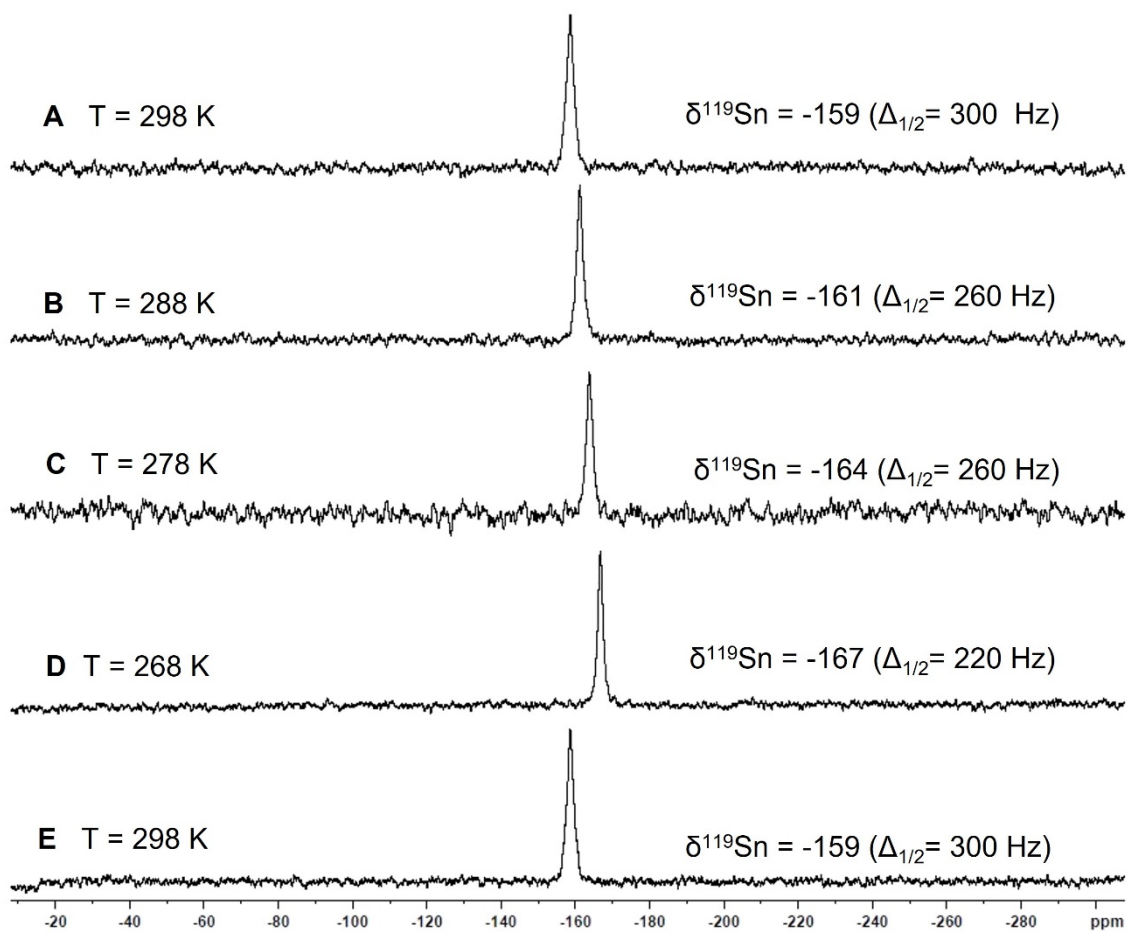

Fig. S4: Variable temperature  $^{119}\text{Sn}$ -NMR spectra of **1**. The bottom spectrum at  $T = 298\text{ K}$  was recorded at room temperature, after cooling, showing the initial chemical shift is restituted.

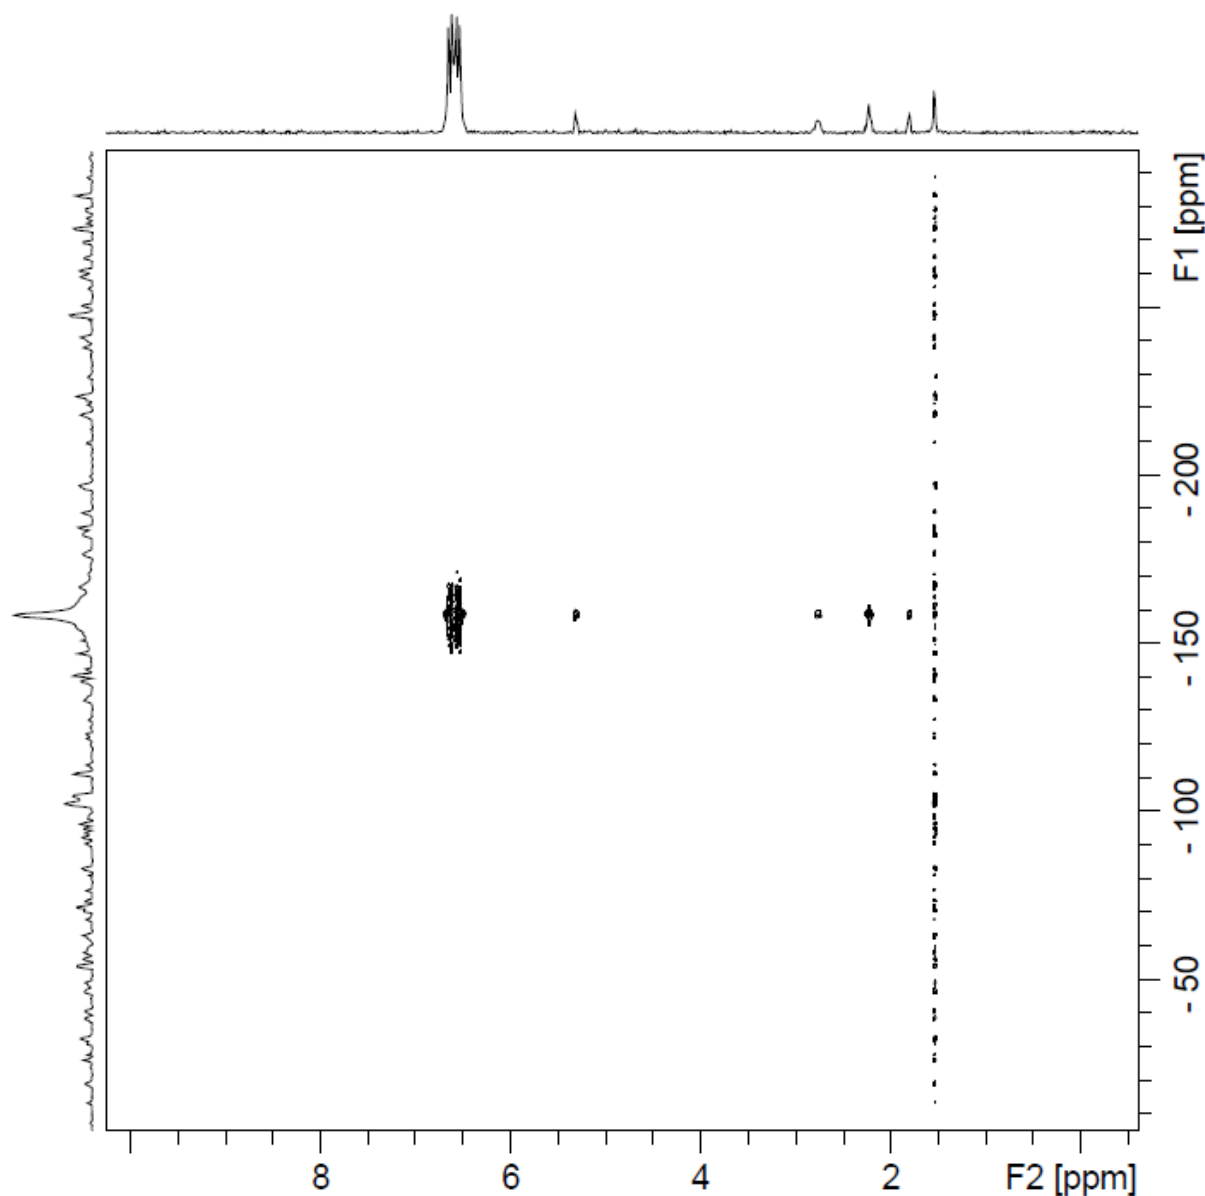

Fig. S5:  $^{119}\text{Sn}$ ,  $^1\text{H}$ -HMBC spectrum of **1**, recorded at 300 MHz.

### Mass spectrometry

For  $\text{Sn}(\text{SBU}^t)_4$  the literature reported<sup>[1]</sup> chemical formulae of the fragment ions is listed below. No rel. intensity and corresponding  $m/z$  values were given, the latter was added manually for comparison.

$\text{Sn}(\text{SBU}^t)_4$  :  $[\text{Sn}(\text{SC}_4\text{H}_9)_4]^+$  ( $[\text{M}]^+$ ,  $m/z$  476),  $[\text{Sn}(\text{S})(\text{SC}_4\text{H}_9)_3]^+$  ( $m/z$  419),  $[\text{Sn}(\text{SC}_4\text{H}_9)_3]^+$  ( $m/z$  387),  $[\text{Sn}(\text{SH})(\text{SC}_4\text{H}_9)_2]^+$  ( $m/z$  331),  $[\text{Sn}(\text{SH})_2(\text{SC}_4\text{H}_9)]^+$  ( $m/z$  275),  $[\text{Sn}(\text{SH})_3]^+$  ( $m/z$  219)

The fragment ion series (fig.1a,b) generated by loss of  $-\text{C}_4\text{H}_9$  (56 u) is accounting for a large part of the mass spectra observed for **1** :  $[\text{Sn}(\text{SC}_4\text{H}_9)_4]^+$  ( $m/z$  476),  $[\text{Sn}(\text{SC}_4\text{H}_9)_3]^+$  ( $m/z$  387),  $[\text{Sn}(\text{SH})(\text{SC}_4\text{H}_9)_2]^+$  ( $m/z$  331),  $[(\text{Sn}(\text{SH})_2(\text{SC}_4\text{H}_9)]^+$  ( $m/z$  275),  $[(\text{Sn}(\text{S})(\text{SC}_4\text{H}_9)]^+$  ( $m/z$  241),  $[\text{Sn}(\text{SH})_3]^+$  ( $m/z$  219).)

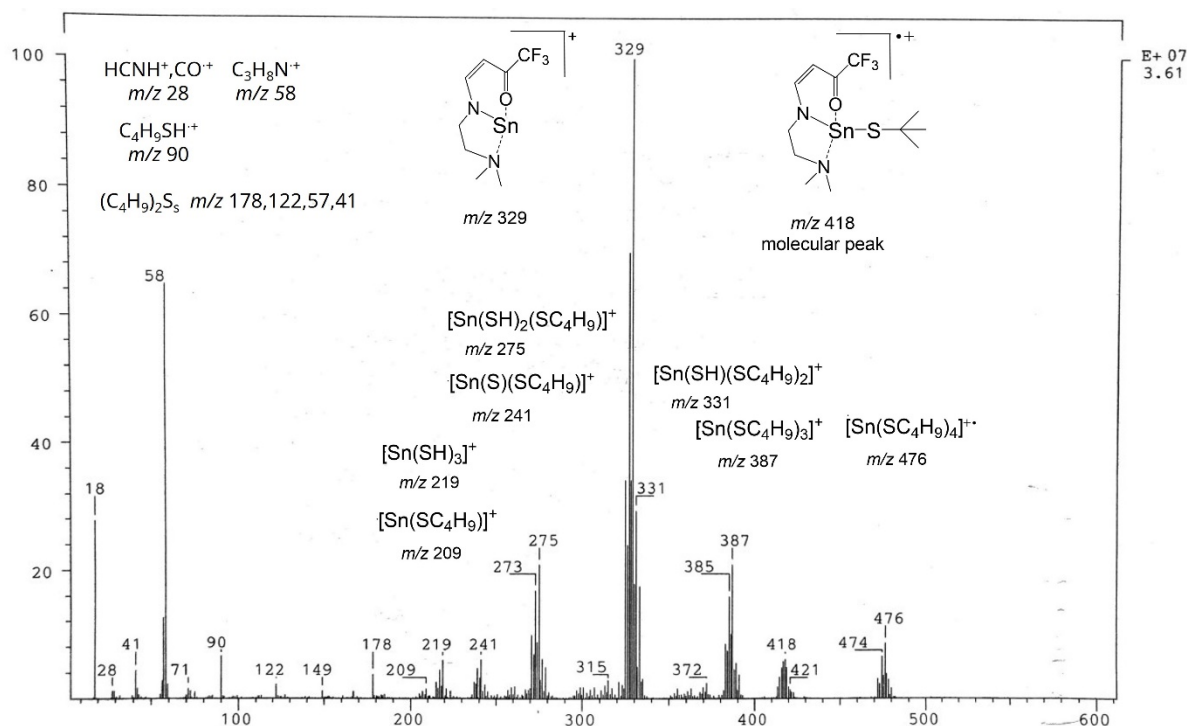

Fig. S6: Experimental EI-MS fragmentation pattern of **1**.

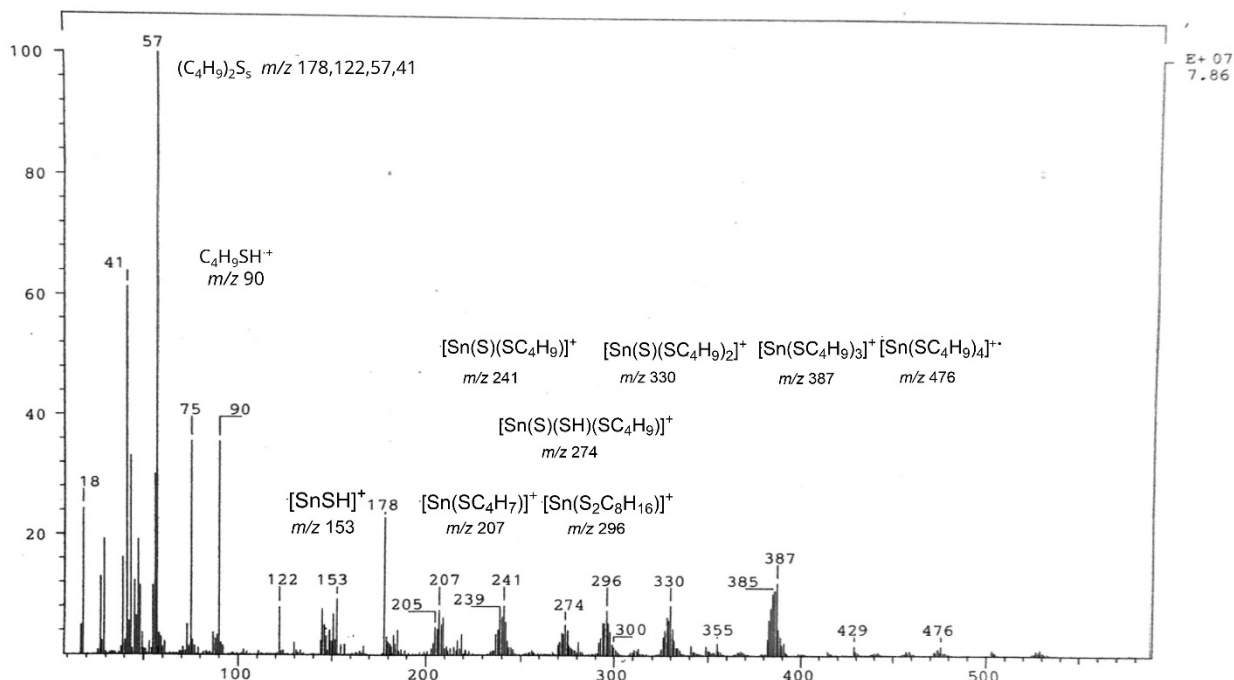

Fig. S7: Experimental EI-MS fragmentation pattern of  $\text{Sn}(\text{SBu}^t)_2$ .

For  $\text{Sn}(\text{SBu}^t)_2$  the molecular peak calculated as  $[\text{Sn}(\text{SC}_4\text{H}_9)_2]^+$  ( $m/z$  298) is absent. Two fragment ions with the corresponding chemical formulae  $[\text{Sn}(\text{SC}_4\text{H}_7)]^+$  ( $m/z$  207) and  $[\text{Sn}(\text{SC}_8\text{H}_{16})]^+$  ( $m/z$  296) point towards the decomposition of a dimer, calculated

as  $[(\text{Sn}(\text{SC}_4\text{H}_9)_2)_2]^+$  ( $m/z$  596), which requires the analysis at an extended detection range to be able to draw further conclusions.

*Table S1: Selected bond lengths of 1*

| Bond lengths / pm |           | Bond lengths / pm |          |
|-------------------|-----------|-------------------|----------|
| Sn(1)-S(11)       | 248.61(8) | Sn(1)-O(11)       | 226.9(2) |
| Sn(2)-S(21)       | 249.25(8) | Sn(2)-O(21)       | 224.8(2) |
| Sn(3)-S(31)       | 248.89(8) | Sn(3)-O(31)       | 223.7(2) |
| Sn(4)-S(41)       | 249.27(8) | Sn(4)-O(41)       | 225.4(2) |
| Sn(1)-N(11)       | 224.9(2)  | Sn(3)-N(31)       | 226.0(2) |
| Sn(1)-N(12)       | 254.2(3)  | Sn(3)-N(32)       | 254.1(3) |
| Sn(2)-N(21)       | 224.6(3)  | Sn(4)-N(41)       | 224.2(2) |
| Sn(2)-N(22)       | 254.5(3)  | Sn(4)-N(42)       | 255.7(3) |

*Table S2: Selected bond angles of 1*

| Bond angles / °   |          | Bond angles / °   |           |
|-------------------|----------|-------------------|-----------|
| N(11)-Sn(1)-S(11) | 84.93(7) | O(11)-Sn(1)-S(11) | 90.77(6)  |
| N(21)-Sn(2)-S(21) | 83.85(7) | O(21)-Sn(2)-S(21) | 91.46(6)  |
| N(31)-Sn(3)-S(31) | 83.12(6) | O(31)-Sn(3)-S(31) | 92.53(6)  |
| N(41)-Sn(4)-S(41) | 84.33(7) | O(41)-Sn(4)-S(41) | 91.01(6)  |
| N(12)-Sn(1)-S(11) | 88.26(7) | O(11)-Sn(1)-N(12) | 154.04(8) |
| N(22)-Sn(2)-S(21) | 86.47(7) | O(21)-Sn(2)-N(22) | 154.10(9) |
| N(32)-Sn(3)-S(31) | 87.10(6) | O(31)-Sn(3)-N(32) | 153.01(8) |
| N(42)-Sn(4)-S(41) | 87.96(6) | O(41)-Sn(4)-N(42) | 153.76(9) |

[1] A. F. Janzen, O. C. Vaidya, C. J. Willis, *J. Inorg. Nucl. Chem.* **1981**, 43, 1469–1471.
